# Supplementary material for: Improving Hydraulic Conductivity Estimation for Soft Clayey Soils, Sediments, or Tailings Using Predictors Measured at High-Void Ratio
Source: Atypon-hosted journal article supplement (doi:10.1061/(asce)gt.1943-5606.0002344), 2020-07-23
Supplement: supplemental_materials_gt.1943-5606.0002344_babaoglu.pdf [file supplemental_materials_gt.1943-5606.0002344_babaoglu.pdf]

## SUPPLEMENTAL MATERIALS

*ASCE Journal of Geotechnical and Geoenvironmental Engineering*

# Improving Hydraulic Conductivity Estimation for Soft Clayey Soils, Sediments, or Tailings Using Predictors Measured at High-Void Ratio

Y. Babaoglu and P. Simms

**DOI:** 10.1061/(ASCE)GT.1943-5606.0002344

© ASCE 2020

[www.ascelibrary.org](http://www.ascelibrary.org)

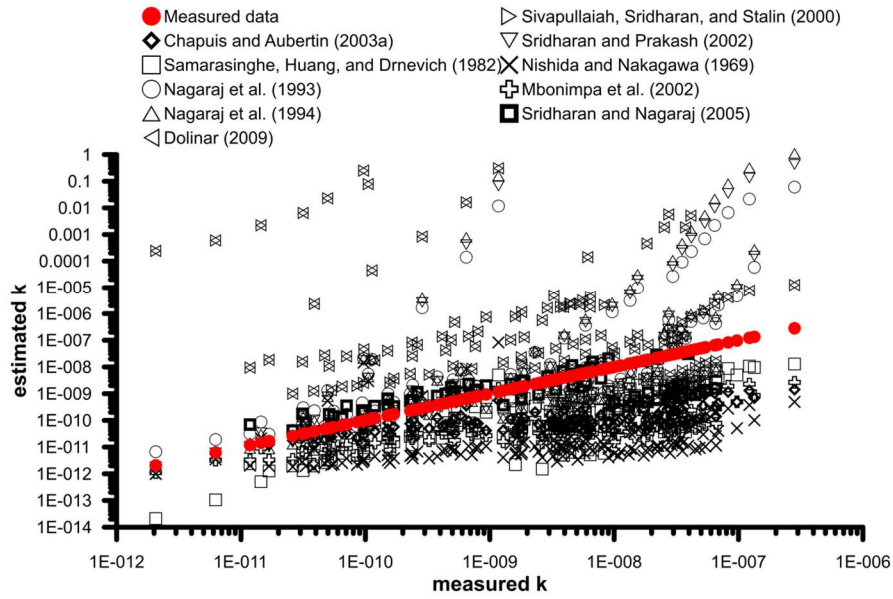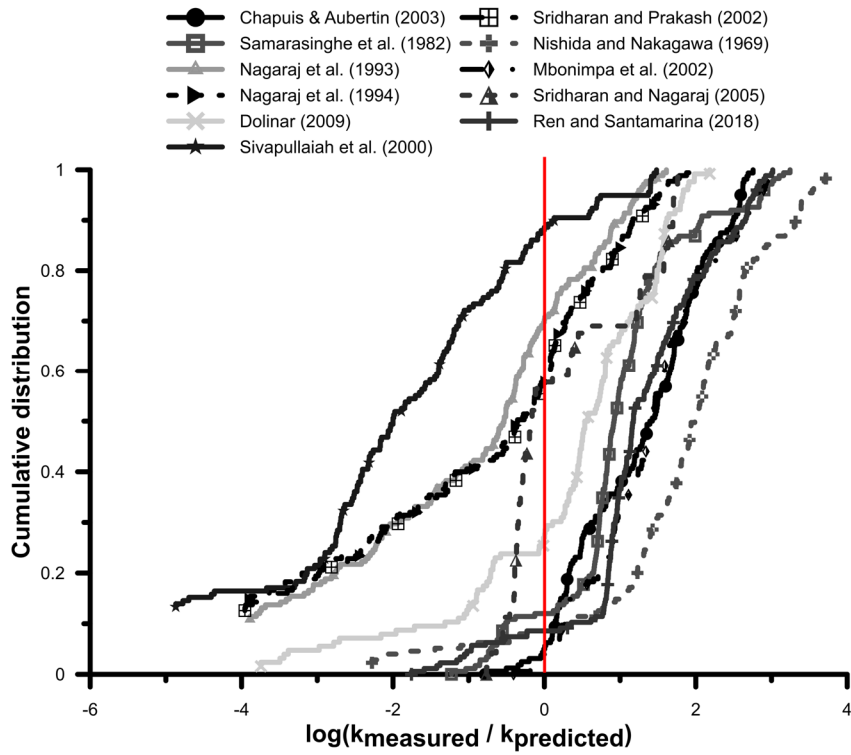

**Figure S1:** The performance of predictive models to estimate void ratio-hydraulic conductivity relationship for clays

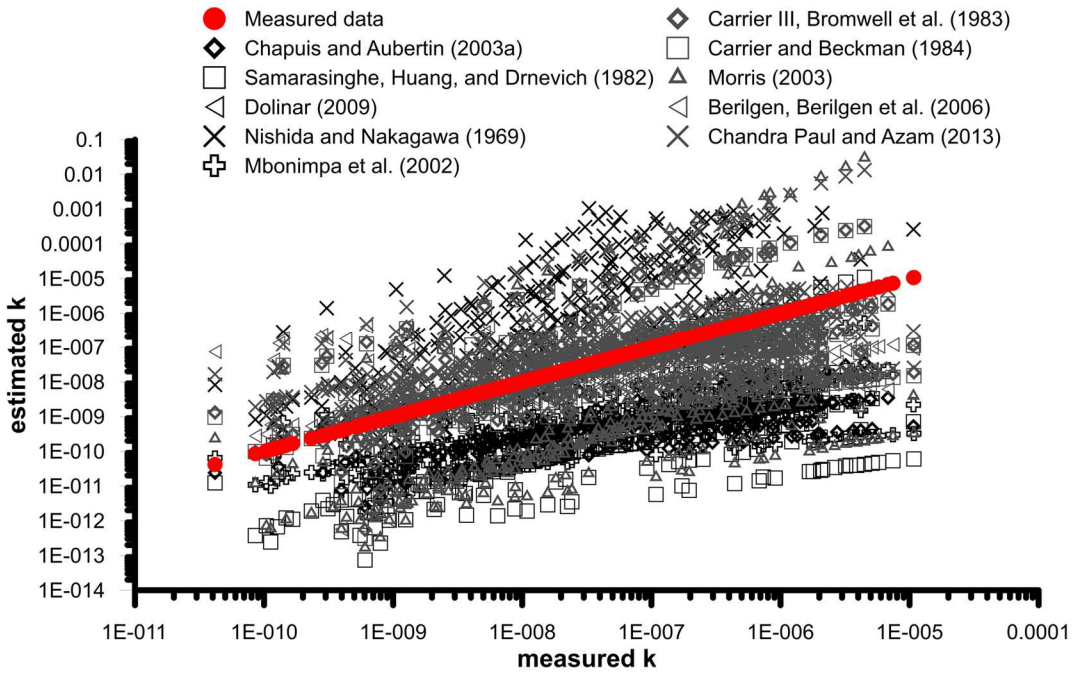

**Figure S2:** Performance of k-e functions fo dredged materials

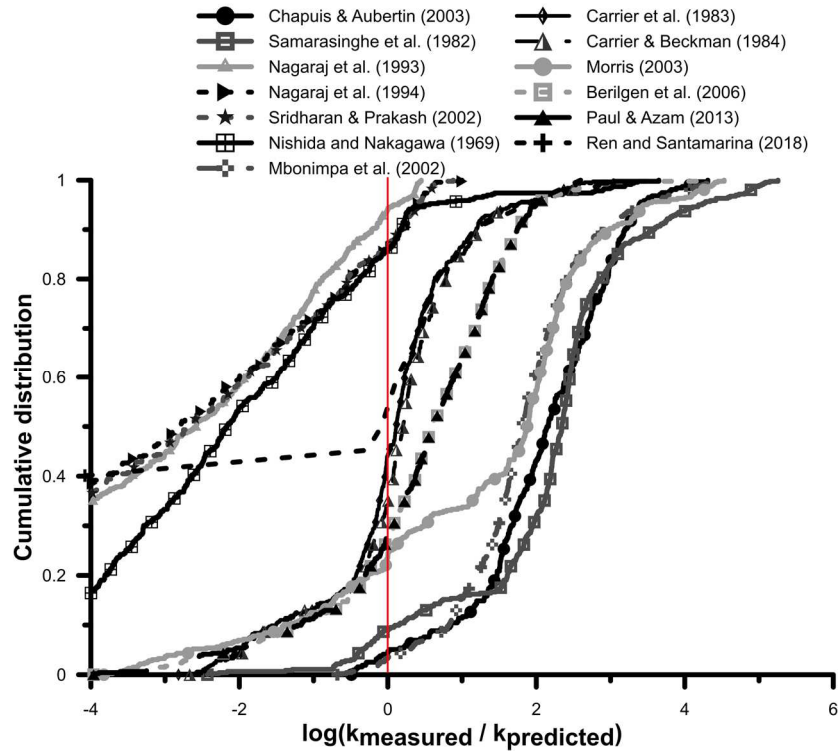

**Figure S3:** Comparison of predictive methods for hydraulic conductivity for dredged soils

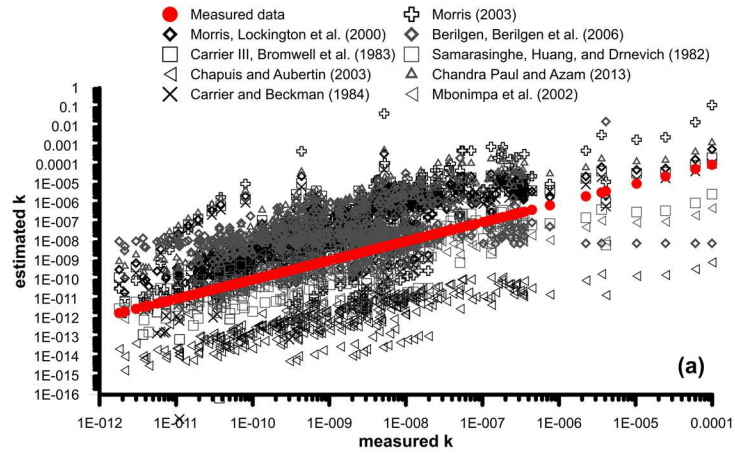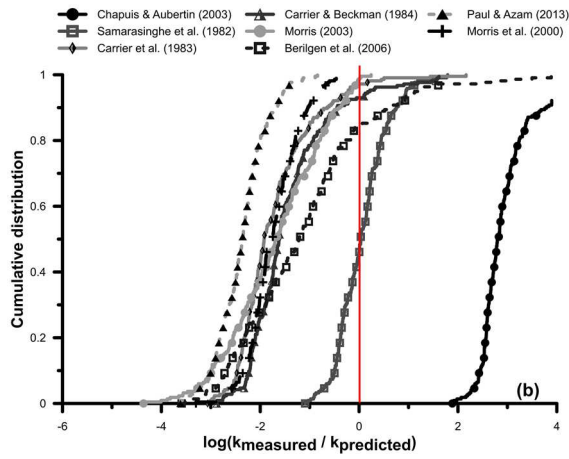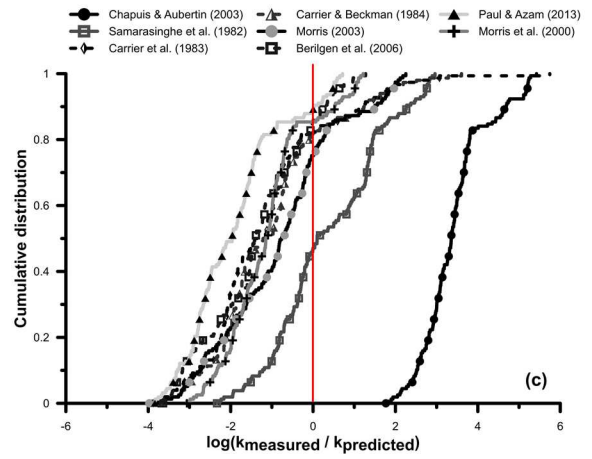

**Figure S4:** (a) Measured vs. predicted saturated hydraulic conductivity values for oil sands tailings (b-c) Performance comparison of predictive methods for estimating hydraulic conductivity for untreated and treated oil sands tailings respectively
